# Supplementary material for: Next Generation Sequencing of Actinobacteria for the Discovery of Novel Natural Products
Source: PubMed Central journal article supplement (PMC4849082; doi:10.3390/md14040078), 2016-04-13
Supplement: marinedrugs-14-00078-s001.pdf [file marinedrugs-14-00078-s001.pdf]

# Supplementary Materials: Next Generation Sequencing of Actinobacteria for the Discovery of Novel Natural Products

Juan Pablo Gomez-Escribano , Silke Alt and Mervyn J. Bibb

**A**

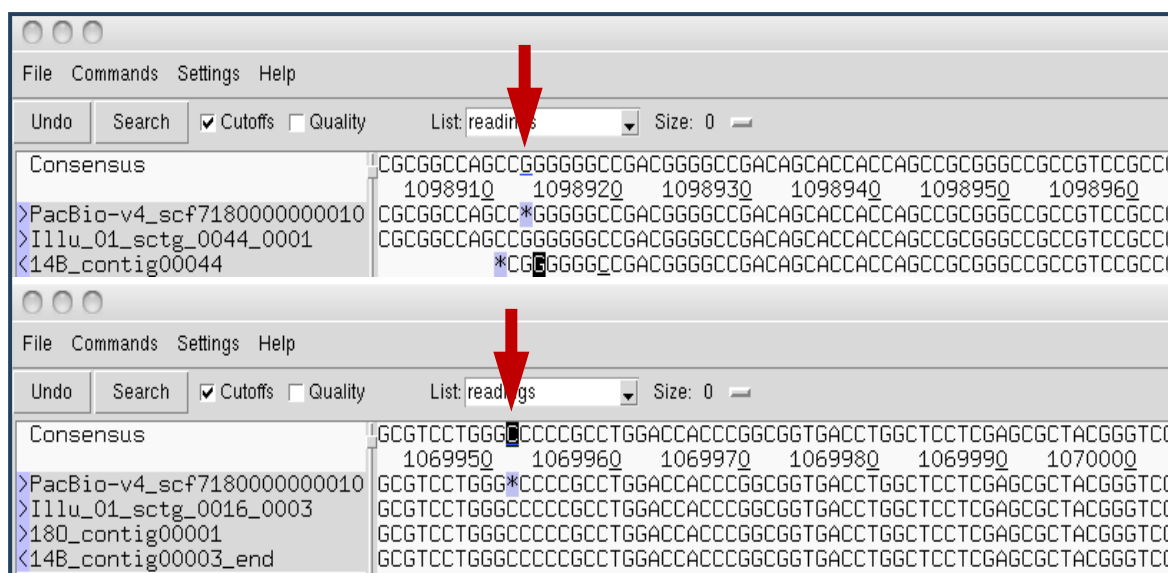

**B**

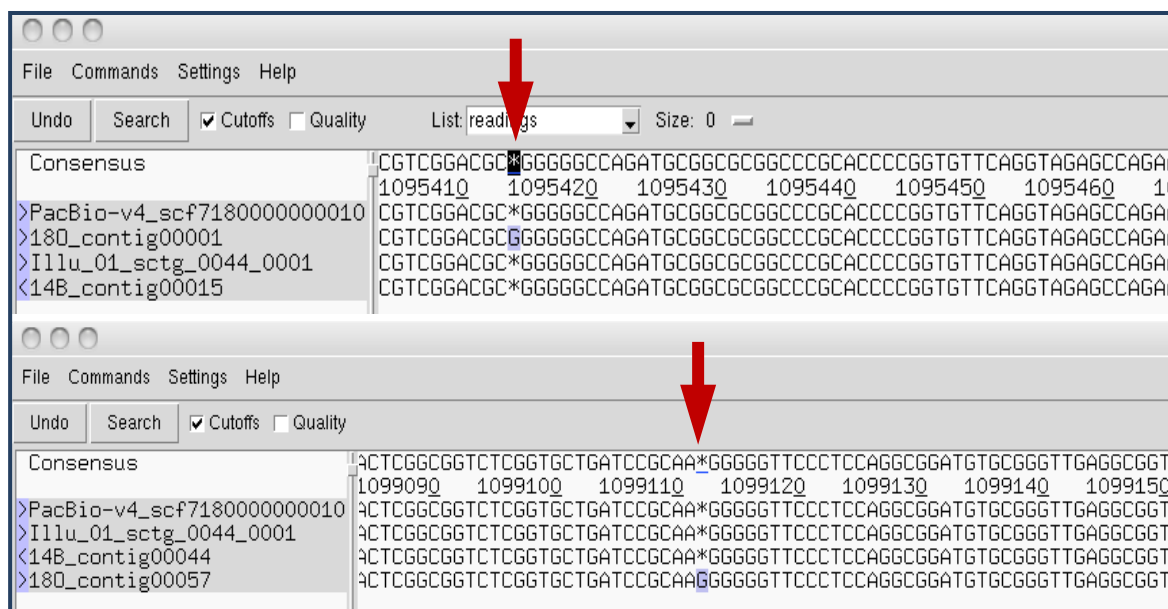

**Figure S1.** Examples of insertions and deletions in PacBio and 454 assembled sequence in homopolymeric runs of G or C. **(A)** Missing (deletion) of one G or C in PacBio. **(B)** Added (insertion) of one G at two positions of a 454 contig.

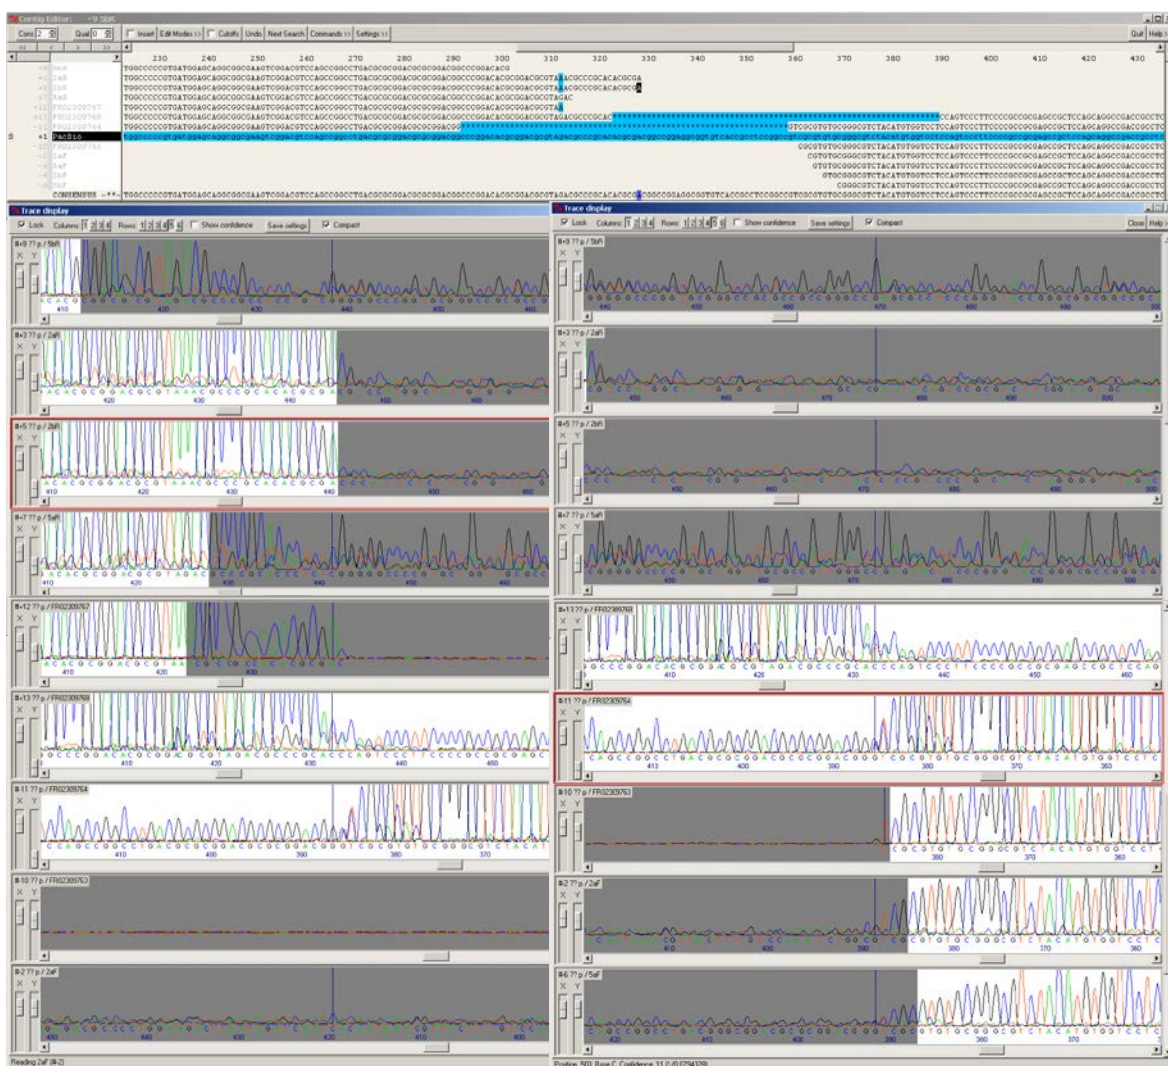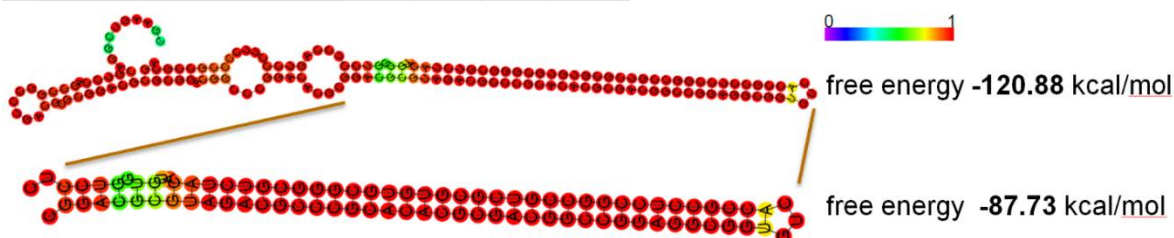

Structure and free energy calculated with RNAfold server (Gruber et al. Nucl. Acids Res. (2008) 36 (suppl 2): W70-W74.)

**Figure S2.** Region posing difficulty for sequencing. Region along which single stranded nucleic acid has the potential to form a strong secondary structure, and that neither Illumina nor Sanger sequencing could resolve, but PacBio did.
